# Supplementary material for: Comparative Genomics of the Baltic Sea Toxic Cyanobacteria Nodularia spumigena UHCC 0039 and Its Response to Varying Salinity
Source: Front Microbiol. 2018 Mar 8;9:356. doi: 10.3389/fmicb.2018.00356 (PMC5853447; doi:10.3389/fmicb.2018.00356)
Supplement: Supplementary file 16 [file Table8.XLSX]

## Sheet: Sheet1
Supplementary Table S8 Gene clusters responsible of the production of known and putative natural products in Nodularia UHCC 0039.
	Gene ID	Gene name	Product	Log2FC	p-value
Nodularin synthase	BMF81_04510	ndaB	non-ribosomal peptide synthetase	−0,61	5,46E−10
	BMF81_04511	ndaA	non-ribosomal peptide synthetase	−0,39	4,47E−04
	BMF81_04512	ndaC	type I polyketide synthas	−0,10	3,79E−01
	BMF81_04513	ndaD	type I polyketide synthas	−0,41	7,65E−04
	BMF81_04514	ndaE	methyltransferase	−0,23	1,20E−02
	BMF81_04515	ndaF	hybrid non-ribosomal peptide synthase/polyketide synthase	−0,37	1,10E−03
	BMF81_04516	ndaG	Aspartate racemase	−0,43	9,99E−07
	BMF81_04517	ndaH	Dehydrogenase	−0,52	1,66E−07
	BMF81_04518	ndaI	ABC transporter	−0,39	1,35E−04
Heterocyst glycolipid synthase	BMF81_02703	hetI	short-chain dehydrogenase	0.32	4,78E−02
	BMF81_02704	hetN	polyketide synthase	0.34	2,23E−01
	BMF81_02705	hetM	2-nitropropane dioxygenase	0.49	1,65E−04
	BMF81_02706		beta-ketoacyl synthase	0.43	8,68E−04
	BMF81_02707	hglC	polyketide synthase	−0,44	7,24E−05
	BMF81_02708		polyketide synthase	−0,87	3,93E−07
	BMF81_02709	hglE	polyketide synthase	−0,68	2,02E−01
Unknown synthase	BMF81_00493		polyketide synthase	−1,75	4,35E−28
	BMF81_00494		siderophore biosynthesis protein	−2,54	8,48E−10
	BMF81_00495		hypothetical protein	−2,60	2,47E−12
	BMF81_00496		hypothetical protein	−2,65	3,20E−14
	BMF81_00497		aspartate aminotransferase family protein	−2,50	1,26E−18
	BMF81_00498		methyltransferase type 11	−2,57	9,68E−17
	BMF81_00499		oxidoreductase	−2,50	2,23E−17
	BMF81_00500		non-ribosomal peptide synthetase	−2,41	5,53E−20
	BMF81_00501		non-ribosomal peptide synthetase	−2,29	5,08E−19
	BMF81_00502		non-ribosomal peptide synthetase	−2,23	1,71E−16
	BMF81_00503		non-ribosomal peptide synthetase	−2,62	5,59E−16
	BMF81_00504		polyketide synthase	−2,57	9,65E−16
	BMF81_00505		non-ribosomal peptide synthetase	−2,57	2,71E−16
	BMF81_00506		non-ribosomal peptide synthetase	−2,22	1,58E−13
	BMF81_00507		hypothetical protein	−1,58	1,27E−09
Nodulapeptin synhase	BMF81_00939	aptA	non-ribosomal peptide synthetase	−0,79	1,23E−06
	BMF81_00940	aptB	non-ribosomal peptide synthetase	−0,85	3,77E−10
	BMF81_00941	aptC	non-ribosomal peptide synthetase	−0,61	2,04E−05
	BMF81_00942	aptD	non-ribosomal peptide synthetase	−0,73	1,71E−07
	BMF81_00943	aptE	2-isopropylmalate synthase	−0,89	2,32E−15
	BMF81_00944	aptF	ABC transporter	−0,59	7,85E−06
Aeruginosin	BMF81_03783	orf1	oxidoreductase	−0,89	3,57E−06
	BMF81_03784	aerK	hypothetical protein	−0,95	1,40E−10
	BMF81_03785	aerG	non-ribosomal peptide synthetase	−0,73	8,92E−11
	BMF81_03786	aerF	short-chain dehydrogenase	−1,03	2,83E−06
	BMF81_03787	aerE	hypothetical protein	−0,95	9,50E−06
	BMF81_03788	aerD	hypothetical protein	−0,82	2,29E−05
	BMF81_03789	aerB	non-ribosomal peptide synthetase	−0,75	1,37E−05
	BMF81_03790	aerM	non-ribosomal peptide synthetase	−0,59	1,94E−03
Spumigin synthase	BMF81_00926	spuD	hypothetical protein	−0,71	1,34E−06
	BMF81_00927	spuE	pyrroline-5-carboxylate reductase	−0,77	4,53E−04
	BMF81_00928	spuD	alcohol dehydrogenase	−0,93	1,06E−08
	BMF81_00929	spuC	hypothetical protein	−1,09	2,15E−13
	BMF81_00930	spuB	non-ribosomal peptide synthetase	−0,73	9,93E−07
	BMF81_00931	spuA	AMP-dependent synthetase	−0,77	2,95E−08
Unknown synthase	BMF81_00524		AMP-dependent ligase	−1,57	4,63E−17
	BMF81_00525		polyketide synthase	−1,32	2,45E−13
	BMF81_00526		polyketide synthase	−2,19	1,35E−22
